# Supplementary material for: The potential effects of climate change on amphibian distribution, range fragmentation and turnover in China
Source: PubMed Central journal article supplement (PMC4974927; doi:10.7717/peerj.2185), 2016-07-28
Supplement: peerj-04-2185-s004.pdf [file peerj-04-2185-s004.pdf]

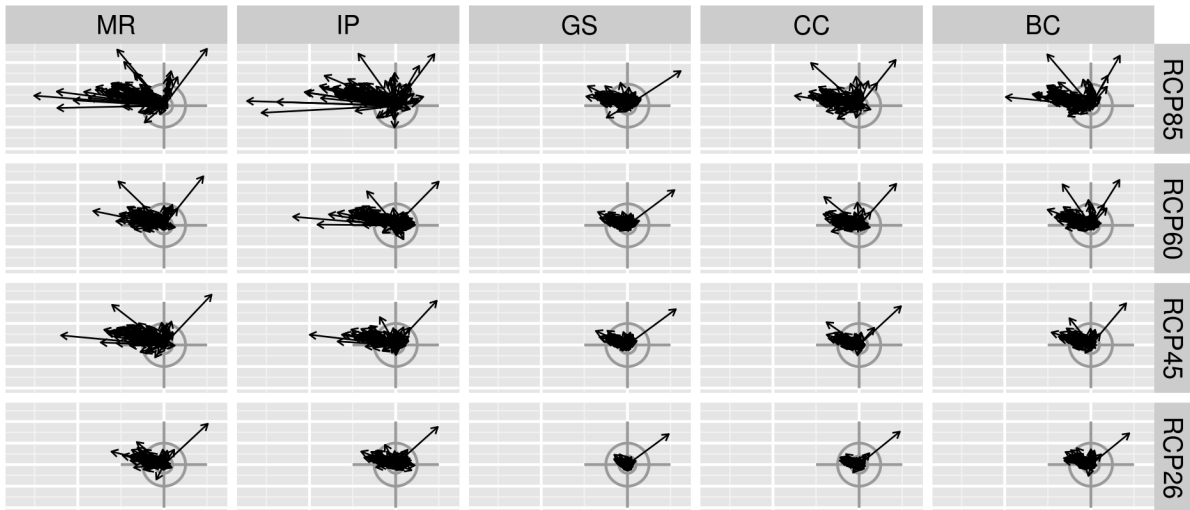

MR

IP

GS

CC

BC

RCP85

RCP60

RCP45

RCP26
