# Supplementary material for: The potential effects of climate change on amphibian distribution, range fragmentation and turnover in China
Source: PubMed Central journal article supplement (PMC4974927; doi:10.7717/peerj.2185), 2016-07-28

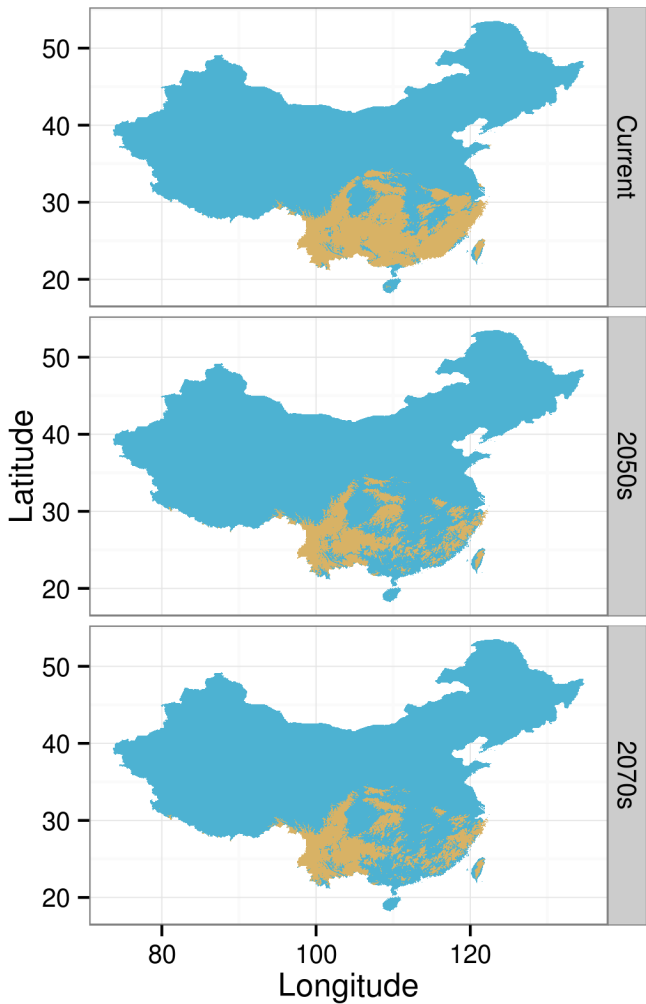

Supplement: peerj-04-2185-s005.pdf [file peerj-04-2185-s005.pdf]
